# Supplementary material
Source: Springer Nature journal article supplement (https://www.springermedizin.de/resource/supplementary/12890_2014_600_MOESM1_ESM.pdf/9505412)

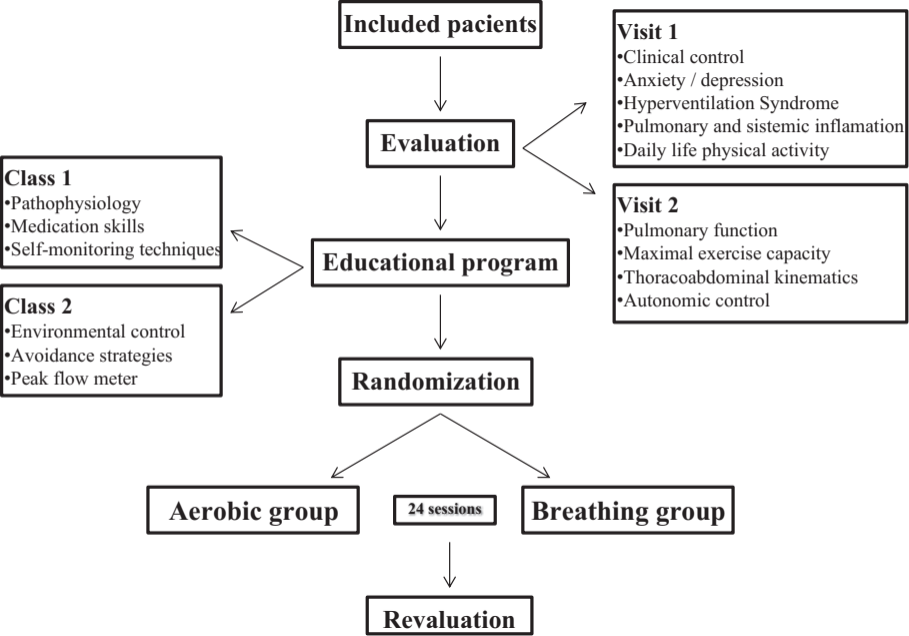

Supplement: MOESM1 [file 9505412]
